# Supplementary material
Source: PubMed Central journal article supplement (PMC6357310)
Supplement: ajtr0011-0361-f7.pdf [file ajtr0011-0361-f7.pdf]

miR-365 inhibited glioblastoma cell proliferation and migration

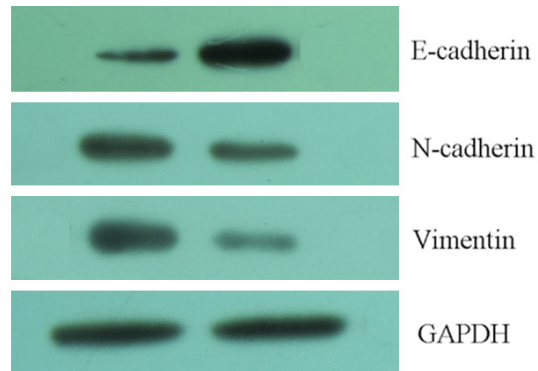

Figure S1. The western images of Figure 4.

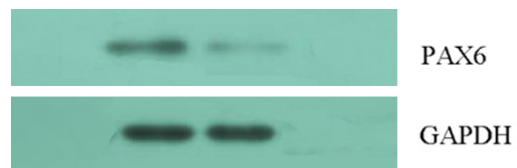

Figure S2. The western images of Figure 5.

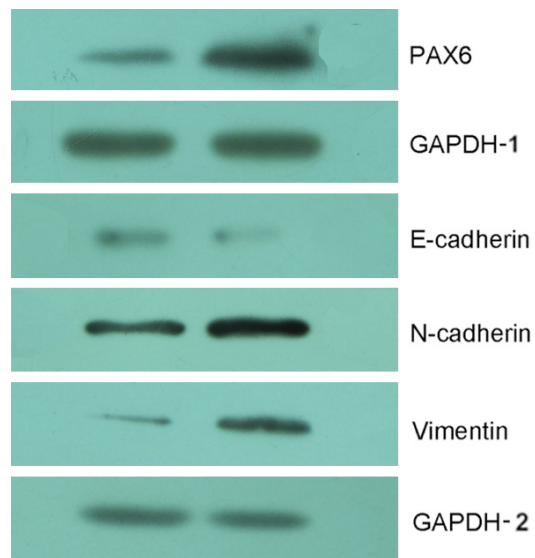

Figure S3. The western images of Figure 6.
